# Supplementary material for: Task-specific gross motor skills training for ambulant school-aged children with cerebral palsy: a systematic review
Source: PubMed Central journal article supplement — BMJ Paediatr Open. 2017 Aug 11;1(1):e000078. doi: 10.1136/bmjpo-2017-000078 (PMC5862184; doi:10.1136/bmjpo-2017-000078), 2017-08-11
Supplement: bmjpo-2017-000078supp001.pdf [file bmjpo-2017-000078supp001.pdf]

## APPENDIX 1

### Search strategy for Ovid databases

1. cerebral palsy.mp. [mp=title, abstract, original title, name of substance word, subject heading word, keyword heading word, protocol supplementary concept word, rare disease supplementary concept word, unique identifier]
2. child\*.mp. [mp=title, abstract, original title, name of substance word, subject heading word, keyword heading word, protocol supplementary concept word, rare disease supplementary concept word, unique identifier]
3. (Task specific or skill specific or task oriented or activity focussed or task practice or goal directed).mp. [mp=title, abstract, original title, name of substance word, subject heading word, keyword heading word, protocol supplementary concept word, rare disease supplementary concept word, unique identifier]
4. (motor imagery or implicit or error reduced or neuromotor task or parent assisted or group or cognitive orientation or repetit\*).mp. [mp=title, abstract, original title, name of substance word, subject heading word, keyword heading word, protocol supplementary concept word, rare disease supplementary concept word, unique identifier]
5. (perceptual motor or kinaesthetic explicit or action observation or dual task or trial and error or practice or imitation or experiential or discrimination or discovery or errorless or analogy or observational or exploratory).mp. [mp=title, abstract, original title, name of substance word, subject heading word, keyword heading word, protocol supplementary concept word, rare disease supplementary concept word, unique identifier]
6. (Training or intervention or therapy or approach or learning or program).mp. [mp=title, abstract, original title, name of substance word, subject heading word, keyword heading word, protocol supplementary concept word, rare disease supplementary concept word, unique identifier]
7. (Motor skill\* or motor function\* or movement skill\* or Motor performance or task performance or occupational performance or motor competence or task competence or occupational competence or skill acquisition or skill attainment or skill proficiency or skill achievement or goal attainment).mp. [mp=title, abstract, original title, name of substance word, subject heading word, keyword heading word, protocol supplementary concept word, rare disease supplementary concept word, unique identifier]
8. 3 or 4 or 5
9. 1 and 2 and 6 and 7 and 8
